# Supplementary material for: Citrullination of Histone H3 Interferes with HP1-Mediated Transcriptional Repression
Source: PubMed Central journal article supplement (PMC3441713; doi:10.1371/journal.pgen.1002934), 2012-09-13
Supplement: pgen.1002934.s003.pdf [file pgen.1002934.s003.pdf]

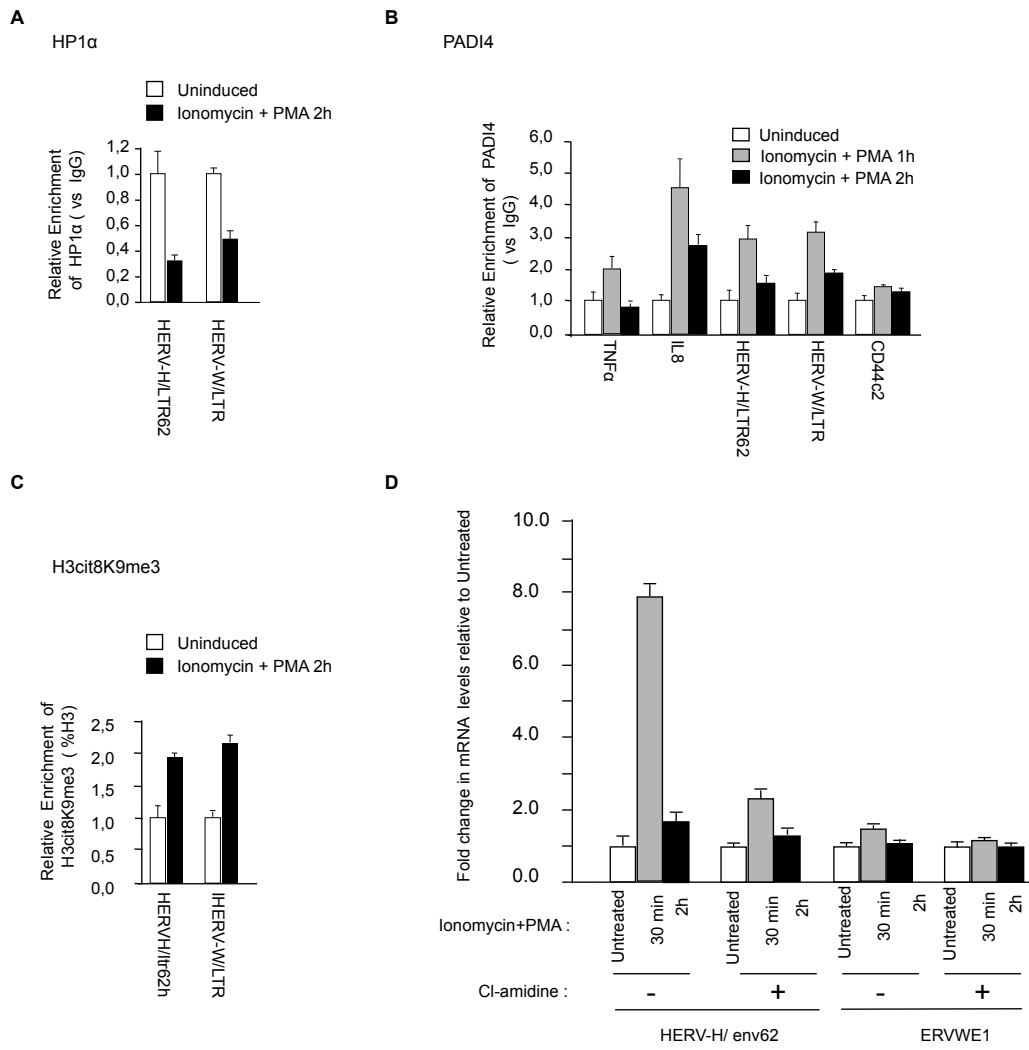

Figure S3 Sharma *et al.*
